# Supplementary material for: Association of Elevated Serum Uric Acid with Nerve Conduction Function and Peripheral Neuropathy Stratified by Gender and Age in Type 2 Diabetes Patients
Source: MDPI journal article supplement (doi:10.3390/brainsci12121704), 2022-12-12
Supplement: s1 [file s1]

**Table S1.** Association between serum uric acid and DPN in all patients and different subgroup respectively, using restricted cubic splines with 3 knots (at the 10th, 50th, and 90th percentiles).

|                  | P-overall | P-nonlinearity |
|------------------|-----------|----------------|
| All patients     | 0.0504    | 0.6838         |
| Male subgroup    | 0.0094    | 0.4455         |
| Femal subgroup   | 0.9186    | 0.6840         |
| Younger subgroup | 0.0324    | 0.4385         |
| Older subgroup   | 0.5350    | 0.6212         |

**Table S2.** Multivariate linear regression analysis of the relationship between serum uric acid and nerve conduction parameters in the female subgroup and older subgroup.

|                              | Female subgroup (n =243) |       | Older subgroup (n =198)  |       |
|------------------------------|--------------------------|-------|--------------------------|-------|
|                              | $\beta$ (95% CI)         | p     | $\beta$ (95% CI)         | p     |
| MNCV                         | -0.002[(-0.009)-(0.004)] | 0.505 | -0.003[(-0.008)-(0.002)] | 0.227 |
| F-wave minimum latency (ms)  | 0.001[(-0.006)-(0.008)]  | 0.871 | 0.007(0.001-0.014)       | 0.028 |
| Ulnar Sensory amplitude (mv) | 0.003[(-0.028)-(0.035)]  | 0.830 | 0.004[(-0.018)-(0.027)]  | 0.703 |
| Motor CV (m/s)               |                          |       |                          |       |
| Ulnar                        | -0.004[(-0.012)-(0.005)] | 0.419 | 0.000[(-0.008)-(0.008)]  | 0.996 |
| Median                       | -0.003[(-0.012)-(0.005)] | 0.459 | -0.002[(-0.009)-(0.004)] | 0.443 |
| Tibial                       | -0.002[(-0.010)-(0.006)] | 0.673 | -0.007[(-0.013)-(0.000)] | 0.036 |
| Common peroneal              | 0.000[(-0.007)-(0.007)]  | 0.997 | -0.002[(-0.007)-(0.004)] | 0.548 |

The model was adjusted for age, sex, duration of diabetes, glycated hemoglobin, body mass index, smoking, hypertension, total cholesterol, triglyceride, high-density lipoprotein cholesterol, low-density lipoprotein cholesterol, and free thyronine (FT4).

MNCV, mean motor nerve conduction velocity; CV, conduction velocity; CI, confidence interval.

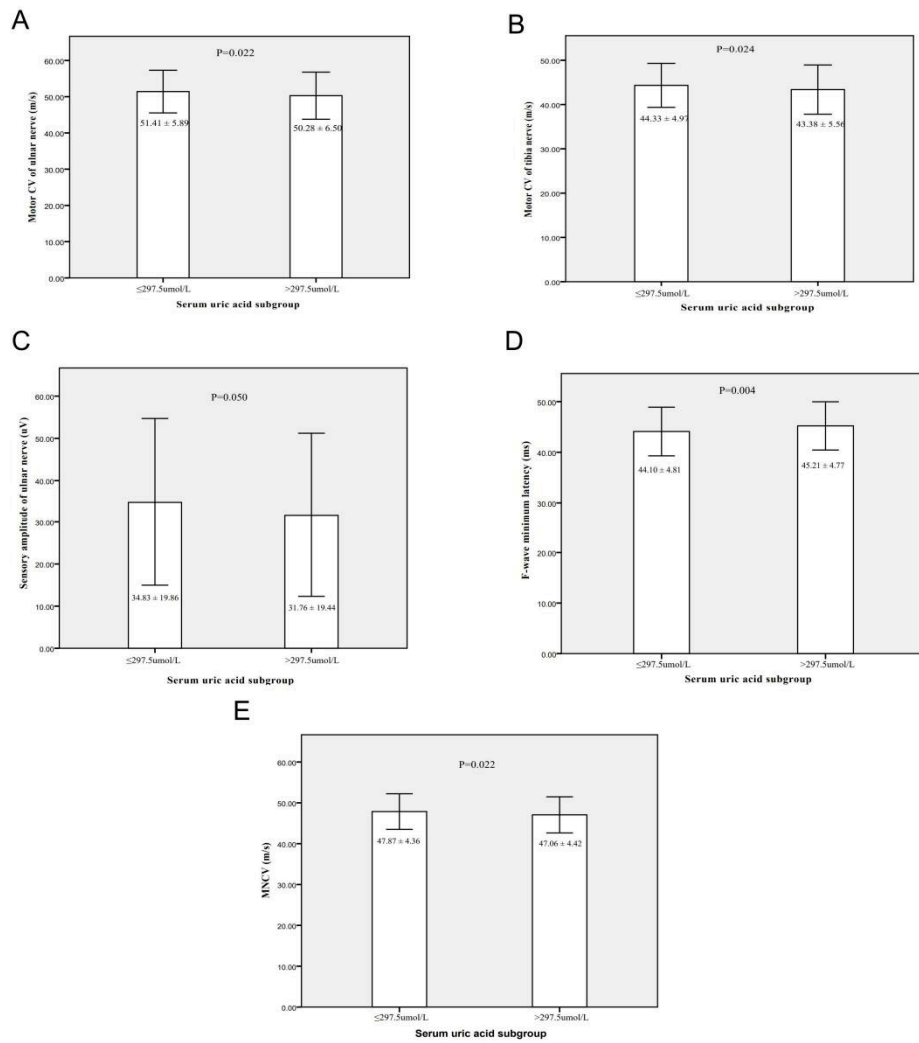

**Figure S1.** Comparison of the Nerve conduction studies parameters between subgroups based on the optimized cut-off of serum uric acid (SUA) level. Abbreviations: CV, conduction velocity; MNCV, mean motor nerve conduction velocity.
